# Supplementary material
Source: publisher site journal article supplement (https://www.spandidos-publications.com/3099/downloadSupplementary)

Figure S1. Chrysoeriol didn't exhibit any cytotoxic effect in LPS-stimulated RAW 264.7 cells. Cells were pre-incubated with or without the indicated concentrations of chrysoeriol for 2 h, then incubated with LPS (1  $\mu\text{g/ml}$ ) for 18 h at 37°C in a humidified atmosphere containing 5% CO<sub>2</sub>. Data represent the mean $\pm$ SD of triplicate experiments. Values sharing the same superscript are not significantly different at  $P<0.05$  by Tukey's multiple comparison tests.

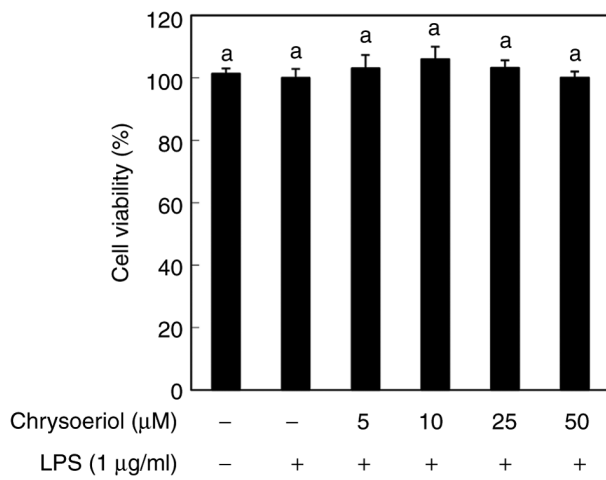

Supplement: Supplementary file 1 [file downloadSupplementary]
